# Supplementary material for: The direct α-zincation of amides, phosphonates and phosphine oxides by H–Zn exchange
Source: Royal Society of Chemistry journal article supplement (doi:10.1039/b509190j), 2005-01-01
Supplement: b509190j.pdf [file b509190j.pdf]

Supporting Information (3 pages)

## The direct $\alpha$ -zincation of amides, phosphonates and phosphine oxides by H-Zn exchange

Mark L. Hlavinka, Jeffrey F. Greco, and John R. Hagadorn\*

*Department of Chemistry and Biochemistry, University of Colorado, Boulder, Colorado, USA  
80309-0215*

*General considerations.* Standard Schlenk-line and glovebox techniques were used unless stated otherwise. N,N-Diisopropylacetamide (DIPA)<sup>1</sup>, ZnPh<sub>2</sub><sup>2</sup> and Zn[N(SiMe<sub>3</sub>)<sub>2</sub>]<sup>3</sup> were prepared following literature procedures. N,N-Dimethylacetamide (DEA), dimethyl methylphosphonate, *tert*-butylamine, diethylamine, triethylamine, pyridine, diisopropylamine, piperidine, pyrrolidine, morpholine, and benzaldehyde were distilled from CaH<sub>2</sub> under N<sub>2</sub>. 4-(Dimethylamino)pyridine, trimethylphosphine oxide, ZnEt<sub>2</sub>, and ZnPh<sub>2</sub> were purchased from commercial sources (Sigma-Aldrich, Alfa, Strem) and were used as received. Toluene, tetrahydrofuran (THF), and CH<sub>2</sub>Cl<sub>2</sub> were passed through columns of activated alumina and sparged with N<sub>2</sub> prior to use. C<sub>6</sub>D<sub>6</sub> was vacuum transferred from Na-benzophenone ketyl. CD<sub>2</sub>Cl<sub>2</sub> was vacuum transferred from CaH<sub>2</sub>. Chemical shifts ( $\delta$ ) for <sup>1</sup>H NMR spectra (400 and 500 MHz) are given relative to residual protium in the deuterated solvent at 7.16, 5.32, and 7.27 ppm for C<sub>6</sub>D<sub>6</sub>, CD<sub>2</sub>Cl<sub>2</sub>, and CDCl<sub>3</sub> respectively.

**Sample Procedure for zincation of carbon acids (entry 10, Table 1).** Toluene (2 mL), ZnPh<sub>2</sub> (40.0 mg, 0.182 mmol), DEA (11.3  $\mu$ L, 0.091 mmol) and morpholine (8.0  $\mu$ L, 0.091 mmol) were combined to form a homogeneous colorless solution. The solution was heated to 50 °C for 24 h. The reaction mixture was cooled to ambient temperature and quenched with 99.9% D<sub>2</sub>O (50  $\mu$ L). The volatiles were evaporated under reduced pressure (0.5 mmHg) to afford a white residue which was extracted with CDCl<sub>3</sub> and filtered. <sup>1</sup>H NMR spectroscopic data indicated the presence of CH<sub>2</sub>DC(O)NEt<sub>2</sub> and CH<sub>3</sub>C(O)NEt<sub>2</sub> in a ratio of 10.2:1 (91% deuteration). All the reactions described in Tables 1 and 2 were performed analogously, but with variation of stoichiometry, substrate, zinc reagent, and amine. <sup>1</sup>H NMR spectroscopic data for the substrates and their deuterated derivatives follow. For the deuterated substrates, only the resonances that differ from those of the parent compound are listed.

**CH<sub>3</sub>C(O)NEt<sub>2</sub>.** <sup>1</sup>H NMR (CDCl<sub>3</sub>): δ 3.39 (q, J = 7.0 Hz, 2H), 3.32 (q, J = 7.0 Hz, 2H), 2.10 (s, 3H, CH<sub>3</sub>), 1.19 (t, J = 7.0 Hz, 3H), 1.13 (t, J = 7.0 Hz, 3H). **CH<sub>2</sub>DC(O)NEt<sub>2</sub>.** <sup>1</sup>H NMR (CDCl<sub>3</sub>): δ 2.08 (t, <sup>2</sup>J = 2.2 Hz, 2H, CH<sub>2</sub>D).

**CH<sub>3</sub>C(O)N<sup>i</sup>Pr<sub>2</sub>.** <sup>1</sup>H NMR (CDCl<sub>3</sub>): δ 3.90 (sept, J = 6.8 Hz, 1H), 3.5 (broad, 1H), 2.09 (s, 3H, CH<sub>3</sub>), 1.37 (d, J = 6.8 Hz, 6H), 1.21 (d, J = 6.8 Hz, 6H). **CH<sub>2</sub>DC(O)N<sup>i</sup>Pr<sub>2</sub>.** <sup>1</sup>H NMR (CDCl<sub>3</sub>): δ 2.08 (t, <sup>2</sup>J = 2.2 Hz, 2H, CH<sub>2</sub>D).

**OPMe<sub>3</sub>.** <sup>1</sup>H NMR (CDCl<sub>3</sub>): δ 1.54 (d, J = 12.8 Hz, 9H). **OPMe<sub>2</sub>CH<sub>2</sub>D.** <sup>1</sup>H NMR (CDCl<sub>3</sub>): δ 1.54 (d, J = 12.8 Hz, 6H), 1.52 (dt, J = 12.8 Hz, 2.0 Hz, 2H).

**CH<sub>3</sub>(MeO)<sub>2</sub>PO.** <sup>1</sup>H NMR (CDCl<sub>3</sub>): δ 3.75 (d, J = 11.0 Hz, 6H, OMe), 1.49 (d, J = 17.5 Hz, 3H, CH<sub>3</sub>). **CH<sub>2</sub>D(MeO)<sub>2</sub>PO.** <sup>1</sup>H NMR (CDCl<sub>3</sub>): δ 1.47 (dt, J = 17.5 Hz, J = 2.0 Hz, 2H, CH<sub>2</sub>D).

**Reaction of zincated DEA with I<sub>2</sub>.** Toluene (10 mL) was added to ZnPh<sub>2</sub> (100 mg, 0.455 mmol), DEA (28.4 μL, 0.228 mmol) and morpholine (19.8 μL, 0.228 mmol) to form a colorless homogeneous solution. The solution was heated to 50 °C for 24 h. At ambient temperature I<sub>2</sub> (0.577 g, 2.28 mmol) was added. The mixture was stirred for 1 h at room temperature. The solution was partitioned between 1 M NaHSO<sub>3</sub> (10 mL) and CH<sub>2</sub>Cl<sub>2</sub> (15 mL). The organics were separated, washed with brine (10 mL) and dried over MgSO<sub>4</sub>. The volatiles were evaporated and the residue was taken up in CDCl<sub>3</sub>. <sup>1</sup>H NMR spectroscopic data revealed the product N,N-diethyl-2-iodoacetamide<sup>4</sup> and DEA in a ratio of 7.3:1 (88% conversion). This crude product contained essentially no (< 5% by NMR) other impurities. <sup>1</sup>H NMR (diethyl-2-iodoacetamide, CDCl<sub>3</sub>): δ 3.72 (s, 2H), 3.38 (q, J = 7.2 Hz, 2H), 3.33 (q, J = 7.2 Hz, 2H), 1.27 (t, J = 7.2 Hz, 3H), 1.12 (t, J = 7.2 Hz, 3H).

**Reaction of zincated DEA with benzaldehyde.** Toluene (2 mL) was added to ZnPh<sub>2</sub> (40 mg, 0.182 mmol), DEA (11.3 μL, 0.091 mmol) and morpholine (8.0 μL, 0.091 mmol) to form a colorless homogeneous solution. The solution was heated to 50 °C for 24 h. The reaction mixture was cooled to ambient temperature and benzaldehyde (9.3 μL, 0.091 mmol) was added. The resulting mixture was stirred for 12 h at room temperature. To the mixture was added 1,3,5-trimethoxybenzene (internal standard) (15 mg, 0.091 mmol). The solution was partitioned between saturated NH<sub>4</sub>Cl (10 mL) and CH<sub>2</sub>Cl<sub>2</sub> (10 mL). The organics were separated and dried

over MgSO<sub>4</sub>. The volatiles were evaporated and the residue was taken up in CDCl<sub>3</sub>. <sup>1</sup>H NMR spectroscopic data showed the addition product N,N-diethyl-3-hydroxy-3-phenylpropionamide<sup>5</sup> and 1,3,5-trimethoxybenzene in a ratio of 0.57:1.0 (57% yield). The reaction was repeated using 10 equivalents of benzaldehyde to give an improved yield of 78%. <sup>1</sup>H NMR (N,N-diethyl-3-hydroxy-3-phenylpropionamide, CDCl<sub>3</sub>): δ 7.4-7.2 (mult, 2H, ArH), 5.14 (dd, J = 10 Hz, J = 2.5 Hz, 1H), 5.02 (d, J = 2.5 Hz, 1H, OH), 3.39 (mult, 2H), 3.23 (mult, 2H), 2.6 (ddd, J = 16 Hz, 9.5 Hz, 2.5 Hz), 1.15 (t, J = 7.0 Hz, 3H), 1.13 (t, J = 7.0 Hz, 3H). <sup>13</sup>C{<sup>1</sup>H} NMR (CDCl<sub>3</sub>): δ 171.7, 143.3, 128.7, 127.7, 126.0, 70.8, 42.1, 41.8, 40.5, 14.2, 13.2.

**Reaction of ZnPh<sub>2</sub> with morpholine.** ZnPh<sub>2</sub> (0.038 g, 0.173 mmol), morpholine (15.1 μL, 0.173 mmol), and 1,3,5-trimethoxybenzene (internal standard) were combined in CD<sub>2</sub>Cl<sub>2</sub> (0.5 mL). The homogeneous solution was heated to 50 °C in an oil bath for 15 minutes. <sup>1</sup>H NMR spectroscopic data indicated complete conversion to PhZn(NC<sub>4</sub>H<sub>8</sub>O). <sup>1</sup>H NMR (CD<sub>2</sub>Cl<sub>2</sub>): δ 7.64 (d, J = 6.5 Hz, 2H), 7.32 (t, J = 7.0 Hz, 2H), 7.28 (m, 1H), 3.82-3.75 (br, 4H), 3.38-3.28 (br, 4H).

## References

- 1 G. Coumbarides, J. Eames, and S. Ghilgaber, *Journal of Labeled Compounds and Radiopharmaceuticals*, 2003, **46**, 1033-1053.
- 2 E. Ashby, G. Willard and A. Goel, *J. Org. Chem.*, 1979, **44**, 1221-1232.
- 3 E. Maile, A. Devi and R. Fischer, *Proceedings – Electrochemical Society*, 2003, 975-981.
- 4 M. Gutierrez, M. Martins and R. Rittner, *Org. Mag. Reson.*, 1982, **20**, 20-25.
- 5 F. Orsini, F. Pelizzoni, M. Pulici and L. Vallarino, *J. Org. Chem.*, 1994, **59**, 1-3.
